# Supplementary material for: Modules for C-terminal epitope tagging of Tetrahymena genes
Source: PubMed Central journal article supplement — J Microbiol Methods. 2010 Sep;82(3):342–6. doi: 10.1016/j.mimet.2010.07.009 (PMC2935961; doi:10.1016/j.mimet.2010.07.009), 2010-09
Supplement: mmc1.pdf [file mmc1.pdf]

# Supplemental Information

## Oligo DNAs

| Name of oligo     | DNA Sequence (5' to 3')                                     |
|-------------------|-------------------------------------------------------------|
| RPB2tag5FW        | CCGCTCTAGATGCCTCCGAACCTTCACACTTATGG                         |
| RPB2tag5RV        | GTCGACACTAGTGGATCCAACATACTTTTACTAGTGACATCAAC                |
| RPB2tag3FW        | GGATCCACTAGTGTGACTGGTCTTAGTCCATCTATCC                       |
| RPB2tag3RV        | GGCGCTCGAGCATTAGTAGGTCTGCCTC                                |
| BamHI-mcherry_Fw1 | GGATCCTATCCTTATGATGTTCTTGATTATGCTTGAAC                      |
| HindIII-Neo4_Rv2  | AAGCTTGATATCGAATTCAGATCCCCGGGCTGCATTTTCCAGT                 |
| 5Am-Pdd1_Fw       | GCTGATGGCGATGAATGAACACTGATGTCCTTAGCCATAATGGGTAGATGTTG       |
| Pdd1-mCherry_Rv   | ATCTTCTTCCTTTTGAACCATGGATCCATGAGTAAGTTATTAATTAGCTTGTC       |
| Neo4-Pdd1_Fw      | CCCCGGGGATCTGAATTCGATATCAAGCTTTCACATTTTAAATTTATGAAAATTTATTC |
| 3Am-Pdd1_Rv       | CCGAGCACAGAATTAATACGACTTCTGAGGAAGTCTTGTAATAAGGTGAAAGC       |
| DCL1GFP5FW        | GCTGATGGCGATGAATGAACACTGCTAATTTATAGAGGATTGCAACC             |
| DCL1GFP5RV        | AAGTCTTCACCCTTAGAAACCATGGATCCTACTTACTTTCCTTAGAATATTAATCCTAG |
| DCL1GFP3FW        | CCCCGGGGATCTGAATTCGATATCAAGCTTTTTAAATATGGTTTCAGCC           |
| DCL1GFP3RV        | GCGAGCACAGAATTAATACGACTCTTATACACAAAGAGGAAGTGCC              |
| NUP4HA5FW         | GCTGATGGCGATGAATGAACACTGCTACATATATGACACTG                   |
| NUP4HA5RV         | GCATAATCAGGAACATCATAAGGATAGGATCCACAACTCCAGTCAAATACTC        |
| NUP4HA3FW         | CCCCGGGGATCTGAATTCGATATCAAGCTTATAGATTTTCTTTAAATATTTGCG      |
| NUP4HA3RV         | GCGAGCACAGAATTAATACGACTGAGACCTGAACCTATTTTGACTGG             |
| 5'RACE-Outer      | GCTGATGGCGATGAATGAACACTG                                    |
| 3'RACE-Outer      | GCGAGCACAGAATTAATACGACT                                     |
| T7                | CGCGTAATACGACTCACTATAG                                      |
| T3                | GCGCAATTAACCCCTCACTAAAG                                     |

## Protocol for Preparation of C-terminal tagging construct by PCR

### 1. Materials required

- Genomic DNA of a wild-type strain, RNaseA treated, ~0.5 µg/µl
- Plasmid DNA containing C-terminal tagging module prepared by Qiagen Mini-prep kit
- Primers to amplify ~0.5-1.0 kb of C-terminal coding and 3' flanking of your target gene
  - 5'FW primer should have 5'RACE-Outer sequence for second PCR
  - 5'RV primer should have overlapping sequences with tag
  - 3'FW primer should have overlapping sequences with neo3/neo4
  - 3'RV primer should have 3'RACE-Outer sequence for second PCR
- For EGFP-neo4:
  - 5'FW: 5'-GCTGATGGCGATGAATGAACACTG-Your gene-3'
  - 5'RV: 5'-AAGTCTTCACCCTTAGAAACCATGGATCC-Your gene-3'
  - 3'FW: 5'-CCCCGGGGATCTGAATTCGATATCAAGCTI-Your gene-3'
  - 3'RV: 5'-GCGAGCACAGAATTAATACGACTI-Your gene-3'
- For HA-neo3/4:
  - 5'FW: 5'-GCTGATGGCGATGAATGAACACTG-Your gene-3'
  - 5'RV: 5'-GCATAATCAGGAACATCATAAGGATAGGATCC-Your gene-3'
  - 3'FW: 5'-CCCCGGGGATCTGAATTCGATATCAAGCTI-Your gene-3'
  - 3'RV: 5'-GCGAGCACAGAATTAATACGACTI-Your gene-3'
- For mCherry-neo4:
  - 5'FW: 5'-GCTGATGGCGATGAATGAACACTG-Your gene-3'
  - 5'RV: 5'-ATCTTCTTCCTTTTGAACCATGGATCC-Your gene-3'
  - 3'FW: 5'-CCCCGGGGATCTGAATTCGATATCAAGCTI-Your gene-3'
  - 3'RV: 5'-GCGAGCACAGAATTAATACGACTI-Your gene-3'
- T7 and T3 Primers (or primers to amplify EGFP-neo4 or mCherry-neo4 cassette)
  - T7: 5'-CGCGTAATACGACTCACTATAG-3'
  - T3: 5'-GCGCAATTAACCCCTCACTAAAG-3'
  - BamHI-EGFP-Fw2: 5'-GGATCCATGGTTTCTAAGGGTGAAGAAGCTTTTCACTGGTGTGTTGTT-3'
  - BamHI-mcherry\_Fw1: 5'-GGATCCTATCCTTATGATGTTCTTGATTATGCTTGAAC-3'
  - HindIII-Neo4-RV2: 5'-AAGCTTGATATCGAATTCAGATCCCCGGGCTGCATTTTCCAGT-3'
- Primers for 2nd PCR
  - 5'RACE-Outer: 5'-GCTGATGGCGATGAATGAACACTG-3'
  - 3'RACE-Outer: 5'-GCGAGCACAGAATTAATACGACT-3'
  - (These primers are complementary to 5'FW or 3'RV. We are just using primers of Ambion LIM-RACE kit. You can use other primers but you also have to change underlined sequences in 5'FW and 3'RV.)
- PrimeStar HS DNA polymerase (Lonza/Takara)
- PCR Clean-up kit (Qiagen, Promega, etc)

## 2. Preparation of Tag-*neo* cassette for overlapping PCR

- 1) Mix following materials
  - 14.8  $\mu$ l water
  - 5  $\mu$ l 5X PrimeStar buffer
  - 2  $\mu$ l 2.5 mM dNTPs
  - 1  $\mu$ l 10  $\mu$ M T7 primer (or BamHI-EGFP-Fw2 for EGFP, BamHI-mcherry\_Fw1 for mCherry)
  - 1  $\mu$ l 10  $\mu$ M T3 primer (or HindIII-Neo4-Rv2 for EGFP and mCherry)
  - 1  $\mu$ l ~1 ng/ $\mu$ l (or ~1/200 diluted Qiagen miniprep) plasmid containing C-terminal tagging module
  - 0.25  $\mu$ l PrimeStar HS DNA polymerase
- 2) Run PCR cycle:
  - 98°C-3 min
  - 35 cycles of 98°C-10 sec/55°C-15 sec/72°C-3 min
  - 72°C-6 min
- 3) Check PCR products by running 3  $\mu$ l of reaction in agarose gel<sup>\*1</sup>

## 3. Preparation of 5' and 3' flanking DNA

- 1) Mix following materials
  - 14.8  $\mu$ l water
  - 5  $\mu$ l 5X PrimeStar buffer
  - 2  $\mu$ l 2.5 mM dNTPs
  - 1  $\mu$ l 10  $\mu$ M 5'FW or 3'FW primer
  - 1  $\mu$ l 10  $\mu$ M 5'RV or 3'RV primer
  - 1  $\mu$ l ~0.5  $\mu$ g/ $\mu$ l *Tetrahymena* genomic DNA
  - 0.25  $\mu$ l PrimeStar HS DNA polymerase
- 2) Run PCR cycle:
  - 98°C-3 min
  - 35 cycles of 98°C-10 sec/55°C-15 sec/72°C-1 min
  - 72°C-3 min
- 3) Check PCR products by running 3  $\mu$ l of reaction in agarose gel<sup>\*2, 3</sup>

## 4. Overlapping PCR

- 1) Mix following materials
  - 28.5  $\mu$ l water
  - 10  $\mu$ l 5X PrimeStar buffer
  - 4  $\mu$ l 2.5 mM dNTPs
  - 1  $\mu$ l 1/10 diluted 5' PCR reaction
  - 1  $\mu$ l 1/10 diluted 3' PCR reaction
  - 1  $\mu$ l 1/100 diluted Tag-*neo* cassette PCR reaction
  - 2  $\mu$ l 10  $\mu$ M 5'RACE-Outer primer
  - 2  $\mu$ l 10  $\mu$ M 3'RACE-Outer primer
  - 0.5  $\mu$ l PrimeStar HS DNA polymerase
- 2) Run PCR cycle:
  - 98°C-3 min
  - 35 cycles of 98°C-10 sec/55°C-15 sec/72°C-4.5 min
  - 72°C-10 min
- 3) Check PCR products by running 3  $\mu$ l of reaction in agarose gel<sup>\*2</sup>
- 4) Purify PCR product using a PCR clean-up kit<sup>\*4</sup>

\*1) Amplification of the mCherry-*neo4* cassette with BamHI-mcherry\_Fw1 and HindIII-Neo4-RV2 provides a few extra bands besides the mCherry-*neo4* cassette, and it is necessary to gel-purify the mCherry-*neo4* cassette.

\*2) If PCR is not successful, try PCR with annealing at 50°C and/or 60°C.

\*3) If you see byproducts and cannot eliminate them by changing annealing temperature, separate PCR reaction in an agarose gel, cut/elute expected size of product, and use 1  $\mu$ l out of the 50  $\mu$ l elution in 4.1 without dilution.

\*4) If byproducts longer than ~2 kb is visible in 4.3, run whole PCR product in an agarose gel, cut expected size of product, and elute in 50  $\mu$ l water.
